# Supplementary material for: Ocean acidification has little effect on the biochemical composition of the coccolithophore Emiliania huxleyi
Source: PLoS One. 2019 Jul 10;14(7):e0218564. doi: 10.1371/journal.pone.0218564 (PMC6619986; doi:10.1371/journal.pone.0218564)
Supplement: S3 Table — (XLSX) [file pone.0218564.s003.xlsx]

## Sheet: Growthrate
Growthrate	mean value	SD
1N HL 400	1.06314	0.0299692
1N HL 1000	1.00659	0.018989
1N LL 400	0.580021	0.0263833
1N LL 1000	0.609329	0.0387029
2N HL 400	0.885649	0.117534
2N HL 1000	0.911838	0.0541668
2N LL 400	0.547408	0.0308339
2N LL 1000	0.510089	0.0118618

## Sheet: Cellsize
Celldiameter [µm]	mean value	SD
2N HL 400	5.68615	0.851238
2N HL 1000	5.84431	0.633993
2N LL 400	4.76243	0.445974
2N LL 1000	4.68695	0.465975
