# Supplementary material for: Ocean acidification has little effect on the biochemical composition of the coccolithophore Emiliania huxleyi
Source: PLoS One. 2019 Jul 10;14(7):e0218564. doi: 10.1371/journal.pone.0218564 (PMC6619986; doi:10.1371/journal.pone.0218564)
Supplement: S4 Table — Concentrations and fold-changes of metabolites. (XLSX) [file pone.0218564.s004.xlsx]

## Sheet: Legend
Fold changes over 1.5 are marked red, under -1.5 blue
p-values under 0,05 are marked green
POC quota were used from Rokitta SD, Rost B., Effects of CO2 and their modulation by light in the life-cycle stages of the coccolithophore Emiliania huxleyi. Limnol Oceanogr. 2012;57: 607–618. doi:10.4319/lo.2012.57.2.0607

## Sheet: Concentrations per cell
		Concentrations																Fold-changes
		2N LL 400		2N LL 1000		2N HL 400		2N HL 1000		1N LL 400		1N LL 1000		1N HL 400		1N HL 1000		2N 1000/400 HL		2N 1000/400 LL		1N 1000/400 HL		1N 1000/400 LL		2N HL/LL 400 ppm		2N HL/LL 1000 ppm		1N HL/LL 400 ppm		1N HL/LL 1000 ppm		2N /1N HL 400 ppm		2N/1N HL 1000 ppm		2N/1N LL 400 ppm		2N/1N LL 1000 ppm
substance	class and unit	mean value	(±)SD	mean value	(±)SD	mean value	(±)SD	mean value	(±)SD	mean value	(±)SD	mean value	(±)SD	mean value	(±)SD	mean value	(±)SD	fold change	p-value	fold change	p-value	fold change	p-value	fold change	p-value	fold change	p-value	fold change	p-value	fold change	p-value	fold change	p-value	fold change	p-value	fold change	p-value	fold change	p-value	fold change	p-value
alanine	amino acids [fg · cell-1]	5.31354	0.930735	3.63612	0.449684	6.0655	2.11233	6.86387	0.28052	5.57418	1.07338	4.80985	0.468972	7.64081	1.31006	8.02946	1.68497	1.13162	0.647558	-1.46132	0.108967	1.05086	0.810214	-1.15891	0.430058	1.14152	0.678993	1.88769	0.00212352	1.37075	0.162251	1.66938	0.104872	-1.25972	0.429969	-1.16981	0.431744	-1.04905	0.808337	-1.3228	0.0630939
arginine		5.13869	0.637845	5.84547	1.57387	21.4786	11.1035	36.2609	4.44917	24.5639	4.93508	24.7381	7.95412	60.2399	10.9318	59.153	19.3938	1.68824	0.191729	1.13754	0.602663	-1.01837	0.949102	1.00709	0.980506	4.17977	0.17249	6.20325	0.0056312	2.45237	0.0284147	2.39117	0.114282	-2.80465	0.0245041	-1.63132	0.233424	-4.7802	0.0290706	-4.23201	0.0731875
asparagine		12.1214	2.41102	13.612	2.42001	10.6817	5.35998	14.7824	1.53538	20.6605	1.48921	21.4036	3.96588	16.7845	1.7351	19.4413	4.62663	1.3839	0.394154	1.12297	0.570566	1.15829	0.511061	1.03597	0.822647	-1.13478	0.753595	1.08599	0.599758	-1.23093	0.0760546	-1.10094	0.672965	-1.57133	0.244054	-1.31516	0.288334	-1.70447	0.0191476	-1.57241	0.0902644
aspartate		8.32136	0.928035	6.20292	1.0265	9.70987	4.20667	11.2256	1.15159	14.249	1.39041	10.2922	0.970342	18.8958	2.73022	20.1679	4.65245	1.1561	0.666072	-1.34152	0.0970408	1.06732	0.759247	-1.38445	0.0353549	1.16686	0.689689	1.80973	0.01031	1.32612	0.122143	1.95954	0.0896266	-1.94604	0.070732	-1.79659	0.105316	-1.71234	0.0105524	-1.65925	0.0150208
glutamate		46.0203	3.99847	35.0508	6.89334	91.5324	38.6594	79.0789	6.51475	38.526	10.6035	20.0283	2.31681	86.0823	12.9531	87.3871	14.5189	1.1362	0.778889	1.62199	0.355866	1.04169	0.814348	-1.15551	0.623464	4.86715	0.190801	3.40943	0.0161906	1.99461	0.00750344	2.40088	0.0317682	-2.13014	0.0950721	-1.95296	0.0527325	-5.19786	0.0129006	-2.77335	0.112871
glutamine		26.814	6.10142	43.492	19.7604	130.508	75.4855	148.283	28.3174	139.375	21.6484	120.618	43.4361	278	29.562	289.591	56.7584	-1.15748	0.695155	-1.31296	0.140745	1.01516	0.929065	-1.92357	0.126565	1.98896	0.236957	2.25612	0.00281671	2.2344	0.0171431	4.36317	0.0202803	1.06331	0.864634	-1.10506	0.51779	1.19453	0.429291	1.75006	0.0786955
glycine		0.842885	0.244112	0.785549	0.247836	0.638423	0.0793974	0.532569	0.062453	0.777554	0.0590753	0.686315	0.111377	0.748452	0.0509117	0.783253	0.120948	-1.19876	0.216308	-1.07299	0.827135	1.0465	0.73524	-1.13294	0.380455	-1.32026	0.359267	-1.47502	0.283376	-1.03888	0.626166	1.14124	0.45159	-1.17234	0.186594	-1.47071	0.0801846	1.08402	0.744955	1.14459	0.643808
histidine		0.356222	0.00616598	0.321253	0.0639928	0.9695	0.17975	1.20893	0.242234	0.706603	0.117284	0.774035	0.23562	0.891901	0.0456539	0.936278	0.170352	1.24696	0.329314	-1.10885	0.520909	1.04976	0.752159	1.09543	0.741631	2.72162	0.0402275	3.76317	0.0286258	1.26224	0.142896	1.20961	0.478205	1.087	0.607929	1.29121	0.270158	-1.9836	0.0513519	-2.40942	0.104123
isoleucine		0.283212	0.00790224	0.283212	0.0713547	1.09658	0.158247	1.24589	0.320296	0.995074	0.159053	1.15829	0.166304	1.72667	0.159509	1.6441	0.308164	1.13616	0.59709	1	0.999993	-1.05022	0.758649	1.16402	0.372702	3.87193	0.018202	4.39912	0.0453661	1.73521	0.0100835	1.41942	0.142363	-1.5746	0.0165983	-1.31962	0.273988	-3.51353	0.0238301	-4.08982	0.00876714
leucine		0.0230402	0.00202533	0.0301835	0.00692277	0.0869776	0.0306273	0.130465	0.0441119	2.97469	0.926653	3.63129	0.417592	4.13147	0.171469	3.86221	0.606831	1.49998	0.32314	1.31003	0.279231	-1.06972	0.599807	1.22073	0.433095	3.77503	0.0974939	4.3224	0.0812459	1.38887	0.216628	1.06359	0.683204	-47.5004	0.000646452	-29.6034	0.0126188	-129.108	0.0459125	-120.307	0.00664477
lysine		7.17865	2.50182	16.0735	3.31247	22.3915	10.458	50.3848	10.4285	15.9442	3.97174	17.541	2.19971	21.8297	3.07927	23.3897	5.34094	2.25018	0.0551993	2.23907	0.042576	1.07146	0.742785	1.10015	0.651841	3.11918	0.170187	3.13465	0.0335056	1.36913	0.177432	1.33342	0.258469	1.02574	0.947655	2.15415	0.0476051	-2.22106	0.0686786	-1.0913	0.633168
methionine		0.0236906	0.0072791	0.0322104	0.00968675	0.342006	0.21061	1.12969	0.490983	0.748554	0.156763	0.55253	0.08649	3.40308	1.15931	2.10804	0.729772	3.30313	0.13797	1.35963	0.380346	-1.61433	0.264334	-1.35477	0.216004	14.4363	0.165868	35.0722	0.087126	4.5462	0.0810209	3.81525	0.0926799	-9.95035	0.0605418	-1.86604	0.200724	-31.5971	0.0223983	-17.1538	0.0127112
phenylalanine		0.0598067	0.0093982	0.055127	0.0175628	0.0898695	0.0459067	0.165113	0.00537454	0.895446	0.298843	1.01826	0.0871792	1.59605	0.0586761	1.22797	0.262152	1.83725	0.144547	-1.08489	0.761175	-1.29974	0.180557	1.13715	0.625751	1.50267	0.453584	2.99513	0.00796768	1.78241	0.0750763	1.20595	0.377709	-17.7596	1.47044e-05	-7.43717	0.0290527	-14.9723	0.0582653	-18.4711	0.00303479
proline		0.273726	0.0288347	0.251739	0.0585796	0.696675	0.0712308	0.691848	0.133272	1.80696	0.24193	1.70935	0.172114	2.86934	0.371986	2.33666	0.311131	-1.00698	0.966761	-1.08734	0.667309	-1.22796	0.197483	-1.0571	0.668604	2.54515	0.00686068	2.74828	0.028031	1.58794	0.0349327	1.36699	0.0848628	-4.11862	0.0120275	-3.37742	0.00867726	-6.60134	0.011351	-6.79016	0.00350107
serine		2.22849	0.335225	1.96043	0.468131	3.65426	1.49019	5.01517	0.996948	2.25931	0.659226	3.82012	0.714734	4.56698	1.60852	6.40931	2.16593	1.37242	0.351589	-1.13674	0.549736	1.4034	0.393089	1.69084	0.0861476	1.63979	0.307291	2.5582	0.032522	2.02141	0.169001	1.67778	0.227381	-1.24977	0.587895	-1.27799	0.472619	-1.01383	0.956748	-1.94862	0.0450613
threonine		3.14908	0.511839	4.22536	1.6664	4.38801	1.9361	8.37173	0.988807	2.14635	0.152804	1.54596	0.201629	3.83828	0.223564	3.78537	0.519633	1.90786	0.0816111	1.34178	0.461863	-1.01398	0.903936	-1.38836	0.031628	1.39343	0.464003	1.9813	0.0508774	1.78829	0.00156446	2.44856	0.0159144	1.14322	0.727643	2.2116	0.00992311	1.46718	0.0990706	2.73317	0.14895
tryptophan		0.00205652	0.000426161	0.00237372	0.000320701	0.00670144	0.00174162	0.011915	0.0056057	0.178846	0.0550682	0.207964	0.0257856	0.336587	0.014666	0.244637	0.0454321	1.77798	0.318181	1.15424	0.451012	-1.37586	0.0918567	1.16281	0.549364	3.25863	0.0564311	5.01955	0.137344	1.88199	0.0478343	1.17634	0.390476	-50.2261	0.00085489	-20.5318	0.0173281	-86.9654	0.0452385	-87.6109	0.00776641
tyrosine		0.00718439	0.000943927	0.00786803	0.00229	0.0168139	0.00357265	0.0283384	0.00325575	0.309338	0.171045	0.47816	0.0907814	0.323916	0.0596838	0.329468	0.125129	1.68542	0.0283659	1.09516	0.72541	1.01714	0.958551	1.54576	0.304259	2.34034	0.0542669	3.60172	0.00285336	1.04713	0.917961	-1.45131	0.251712	-19.2647	0.0180753	-11.6262	0.0764529	-43.0569	0.129757	-60.7725	0.0180739
valine		0.991966	0.291545	1.50561	0.626762	3.64755	1.56277	5.98995	1.05066	2.66031	0.636162	2.87872	0.41112	4.87455	0.792283	4.82438	1.09451	1.64218	0.163497	1.51781	0.374746	-1.0104	0.960874	1.0821	0.707614	3.67709	0.133785	3.97841	0.0112794	1.83233	0.0391775	1.67588	0.115168	-1.33639	0.395802	1.2416	0.338457	-2.68185	0.047933	-1.91199	0.0702775
DMSP	osmolytes [fg · cell-1]	247.609	26.8218	302.984	14.8969	220.826	134.255	263.277	43.9566	0.0143052	0.0202307	0	0	0.478642	0.327154	0.410599	0.141553	1.19224	0.705682	1.22364	0.0803937	-1.16572	0.806342			-1.12129	0.806295	-1.15082	0.329915	33.4592	0.182074			461.36	0.146025	641.202	0.0136941	17309
glycine betaine		21.6218	2.42075	19.9373	5.79704	32.2852	12.7092	29.0301	3.54848	17.7302	4.28203	23.6552	2.7675	18.0435	2.67894	24.3839	2.6676	-1.11213	0.75647	-1.08449	0.732587	1.35139	0.0766745	1.33418	0.187506	1.49318	0.357002	1.45607	0.14608	1.01767	0.935071	1.33418	0.187506	1.7893	0.251182	1.19054	0.218252	1.21949	0.340973	-1.18648	0.47557
homarine		32.445	3.39913	31.4614	3.3381	39.9721	19.0627	44.553	3.70754	25.9256	5.37513	32.1106	4.38109	30.9797	4.85854	31.2637	4.45218	1.1146	0.768425	-1.03126	0.784842	1.00917	0.954337	1.23857	0.278296	1.232	0.634764	1.41611	0.0210354	1.19495	0.38027	1.23857	0.278296	1.29027	0.57752	1.42507	0.0330671	1.25147	0.233155	-1.02063	0.876254
mannitol	sugar [fg · cell-1]	4.56698	1.60852	6.40931	2.16593	2.25931	0.659226	3.82012	0.714734	3.65426	1.49019	5.01517	0.996948	2.22849	0.335225	1.96043	0.468131	1.51198	0.375357	1.27333	0.496902	-1.22468	0.613453	-4.45719	0.295393	2.04762	0.36761	2.4314	0.0304719	1.51198	0.375357	1.27333	0.496902	2.34748	0.309918	4.34681	0.194853	4.76216	0.273761	27.0274	0.182015
a-ketoglutarate	small carboxylic acids [ag · cell-1]	2.17843	0.619632	2.6891	0.854657	9.11399	5.19655	9.27436	2.97935	1.10181	0.0776245	1.05854	0.166237	2.54962	0.739718	1.47261	0.730403	1.0176	0.972045	1.23442	0.534874	-1.73136	0.216752	-1.04088	0.761853	4.18374	0.198237	3.44888	0.0791053	2.31402	0.107929	1.39118	0.509485	3.57464	0.214068	6.2979	0.0634241	1.97714	0.124372	2.54039	0.134177
citrate		4.30119	1.80833	4.52503	0.747021	8.03748	1.32169	5.56121	0.216286	38.5882	7.09839	37.1193	12.495	118.379	21.9473	128.823	8.39346	-1.44527	0.114187	1.05204	0.882944	1.08823	0.580931	-1.03957	0.893769	1.86867	0.083745	1.22899	0.181754	3.06774	0.0266192	3.47051	0.00177575	-14.7283	0.0189109	-23.1645	0.00224333	-8.97153	0.0159212	-8.2031	0.0634115
fumarate		2.60575	1.08128	1.08487	0.789489	2.73104	0.76779	2.01525	0.189346	1.97547	0.159023	2.90685	0.415044	2.64109	0.350535	1.93053	0.56092	-1.35519	0.316926	-2.40189	0.189968	-1.36806	0.216544	1.47147	0.0717823	1.04808	0.900821	1.85759	0.233731	1.33694	0.0984797	-1.50573	0.124998	1.03406	0.890392	1.04388	0.321486	1.31905	0.460266	-2.67944	0.0312648
lactate		20.9333	19.2809	5.41854	1.33011	11.6074	3.09613	5.1563	3.68514	11.917	2.12963	8.97152	0.683811	17.412	7.33677	8.58631	2.05227	-2.25111	0.133037	-3.86327	0.373047	-2.02788	0.226116	-1.32832	0.181631	-1.80345	0.566057	-1.05086	0.931611	1.4611	0.402681	-1.04486	0.820847	-1.50008	0.386234	-1.66521	0.103901	1.75659	0.562282	-1.65571	0.0145471
malate		7.91709	1.27825	6.1708	1.10891	13.0256	4.09245	7.4539	0.966728	10.2655	1.43922	13.0268	1.56514	12.7661	1.21086	10.4697	1.36159	-1.74748	0.188948	-1.28299	0.219592	-1.21933	0.150264	1.26899	0.140651	1.64525	0.213436	1.20793	0.286096	1.24359	0.135335	-1.24423	0.157627	1.02033	0.938262	-1.4046	0.0173865	-1.29662	0.20664	-2.11104	0.00702003
pyruvate		1.75875	0.884072	1.2951	0.119732	1.89619	0.720075	1.92765	0.267516	1.31476	0.236674	1.20529	0.243093	2.00706	0.490911	1.36726	0.403657	1.01659	0.958048	-1.35801	0.536489	-1.46794	0.230175	-1.09082	0.67188	1.07814	0.873247	1.48842	0.0613594	1.52656	0.174024	1.13438	0.657521	-1.05847	0.867064	1.40987	0.965543	1.3377	0.521517	1.07451	0.601319
succinate		41.5509	31.7835	7.10411	1.65406	11.984	3.93906	10.8757	2.70684	9.39518	0.358051	13.3256	4.90449	14.9519	1.57173	13.111	0.68978	-1.1019	0.761407	-5.84885	0.264864	-1.14041	0.234804	1.41835	0.374599	-3.46719	0.318367	1.53091	0.182639	1.59145	0.0324129	-1.01637	0.956515	-1.24766	0.404698	-1.20552	0.042282	4.42257	0.285472	-1.87576	0.161594
chlorophyll a	pigments [relative abundance cell 10^3]	94.0914	7.27807	87.9545	3.11012	100.384	39.2204	133.53	13.7571	97.0788	7.453	92.9867	14.2764	116.084	2.84925	112.621	21.6484	1.33019	0.35645	-1.06977	0.360711	-1.03075	0.84275	-1.04401	0.743037	1.06688	0.842989	1.51817	0.0371189	1.19577	0.0545379	1.21116	0.353152	-1.1564	0.396913	1.18565	0.346921	-1.03175	0.982966	-1.05721	0.20372
chlorophyll c2		42.5248	5.12052	32.2551	3.44834	50.5645	23.2466	53.0848	3.45817	50.6907	14.811	44.906	14.5631	104.504	8.98389	62.1501	3.03298	1.04984	0.892853	-1.31839	0.0875169	-1.68148	0.0142865	-1.12882	0.713794	1.18906	0.676304	1.64578	0.00380787	2.06161	0.0179264	1.384	0.232883	-2.06675	0.039954	-1.17077	0.00101753	-1.19202	0.59503	-1.39222	0.226037
chlorophyll c3		35.8687	2.48325	37.7722	5.81722	37.8008	9.12225	42.886	4.40251	34.4874	1.13549	20.7899	11.9386	40.5901	8.89426	26.6986	3.46334	1.13453	0.53081	1.05307	0.701952	-1.52031	0.145886	-1.65885	0.245438	1.05387	0.796623	1.13539	0.381474	1.17695	0.434584	1.28421	0.561878	-1.07379	0.467402	1.6063	0.360647	1.04005	0.290953	1.81685	0.318816
diadinoxanthin		17.4812	2.77525	16.8533	2.5196	29.004	14.266	35.515	4.86566	24.6013	2.47134	21.8243	5.16629	33.7664	2.0171	31.301	1.61139	1.22449	0.593017	-1.03726	0.82447	-1.07876	0.251427	-1.12724	0.54415	1.65915	0.371684	2.1073	0.0170387	1.37254	0.0165668	1.43423	0.111354	-1.1642	0.475011	1.13463	0.101169	-1.4073	0.0725657	-1.29496	0.162898
fucoxanthin		6.56503	0.896127	4.80647	1.21047	14.0208	4.92625	15.3286	1.52709	16.8175	4.06662	13.7674	9.73838	28.4375	8.61411	14.6857	7.09548	1.09328	0.749252	-1.36587	0.180062	-1.93641	0.158979	-1.22154	0.713205	2.13568	0.161878	3.18916	0.00193367	1.69095	0.187784	1.0667	0.919826	-2.02823	0.330752	1.04378	0.412315	-2.56168	0.882634	-2.86435	0.848316
h4k-fucoxanthin		5.09774	1.03167	3.31674	1.65272	11.8069	1.64896	7.07479	1.30578	14.7334	4.8979	8.16611	4.82903	13.7051	3.25068	7.32613	5.47913	-1.66887	0.0359764	-1.53697	0.277959	-1.87072	0.245013	-1.80421	0.248278	2.3161	0.0126098	2.13306	0.0684408	-1.07503	0.818528	-1.11466	0.878797	-1.16077	0.103032	-1.03553	0.516457	-2.89018	0.0666814	-2.46209	0.293672
hex-fucoxanthin		157.243	9.18456	145.263	6.93313	165.53	61.9985	213.745	22.0765	160.792	12.2199	110.817	78.4157	197.567	6.39288	178.031	37.9097	1.29127	0.389864	-1.08247	0.220084	-1.10973	0.543472	-1.45097	0.463369	1.05271	0.868266	1.47143	0.0382788	1.22871	0.0322961	1.60654	0.357742	-1.19354	0.304587	1.2006	0.605789	-1.02257	0.105782	1.31084	0.253174
PL C14:0	polar lipid FAMEs [ag · cell-1]	66.3117	13.3491	71.8961	4.90341	96.4505	29.3644	122.971	9.44513	70.381	1.12364	68.2883	2.43882	102.663	8.16991	77.9319	40.5961	1.27497	0.329652	1.08422	0.623917	-1.31734	0.481458	-1.03064	0.355687	1.4545	0.284198	1.7104	0.00650302	1.45867	0.028637	1.14122	0.769072	-1.06441	0.797033	1.57793	0.254193	-1.06137	0.708833	1.05283	0.421661
PL C16:0		159.557	50.8729	194.184	22.9525	200.479	88.2273	275.015	41.3407	145.835	7.08687	147.479	12.0299	218.219	18.4211	211.172	154.859	1.37179	0.362573	1.21702	0.449429	-1.03337	0.954722	1.01127	0.877606	1.25647	0.60734	1.41626	0.0909144	1.49634	0.0200275	1.43188	0.619983	-1.08849	0.805013	1.30232	0.623671	1.09409	0.74069	1.31669	0.0834302
PL C18:0		163.617	54.4616	204.156	24.1621	195.695	98.0688	280.709	35.922	134.914	9.46236	143.092	22.2888	209.927	19.6258	210.384	158.294	1.43442	0.346871	1.24776	0.412514	1.00218	0.997124	1.06062	0.668901	1.19606	0.711996	1.37498	0.0755918	1.55601	0.0181541	1.47027	0.60999	-1.07272	0.857891	1.33427	0.597301	1.21275	0.535355	1.42675	0.0587518
PL C18:1n9c		61.8329	15.8538	63.4566	6.13263	75.6784	9.63026	97.2982	9.73108	75.1966	2.16491	70.1047	1.07523	107.726	11.3951	65.8731	26.6661	1.28568	0.0892936	1.02626	0.902353	-1.63536	0.143723	-1.07263	0.0604068	1.22392	0.36225	1.5333	0.0200351	1.43259	0.0517546	-1.06424	0.843335	-1.42347	0.0398859	1.47706	0.231986	-1.21613	0.35525	-1.10477	0.263146
PL C18:1n9t		25.3129	7.01701	25.5874	2.263	32.0059	2.58807	41.7734	7.57846	32.0263	0.816571	30.1621	0.781594	45.5421	4.86658	28.3333	11.7627	1.30518	0.202685	1.01084	0.962057	-1.60737	0.163296	-1.06181	0.0801614	1.26441	0.309515	1.63258	0.0839281	1.42202	0.0555199	-1.06454	0.846546	-1.42293	0.0392856	1.47436	0.2571	-1.26522	0.30815	-1.17879	0.0909219
PL C18:2n6c		33.3936	8.50058	33.6722	3.00495	37.6454	3.38152	46.7909	4.21924	41.2291	1.09222	38.2618	0.193827	58.2817	6.75636	33.6138	12.9973	1.24294	0.0780632	1.00835	0.968393	-1.73386	0.0972725	-1.07755	0.0575036	1.12733	0.564151	1.3896	0.0274236	1.41361	0.0668057	-1.13828	0.663287	-1.54818	0.0317451	1.39201	0.285756	-1.23464	0.32172	-1.1363	0.162844
PL C18:3n3		29.089	8.14263	28.6604	2.27103	31.8716	3.12247	38.6105	3.00933	35.5837	2.11834	34.9432	1.75419	47.878	4.84157	27.0727	11.2527	1.21144	0.0929888	-1.01495	0.948582	-1.7685	0.104717	-1.01833	0.758969	1.09566	0.687044	1.34717	0.0230451	1.34551	0.0525321	-1.29072	0.427356	-1.50222	0.0230604	1.42618	0.281645	-1.22327	0.377208	-1.21921	0.0395056
PL C18:4		29.3284	7.42025	28.4379	1.73434	34.8899	3.17871	43.197	4.41078	37.3593	0.959355	34.0836	0.365643	54.6935	5.59113	31.3442	11.7398	1.23809	0.103644	-1.03131	0.882593	-1.74493	0.0887232	-1.09611	0.0281161	1.18963	0.408637	1.51899	0.0289683	1.46399	0.044746	-1.0874	0.772807	-1.5676	0.0199549	1.37815	0.287955	-1.27383	0.264446	-1.19853	0.0391192
PL C22:6n3		72.9004	20.0492	71.0442	5.68903	76.8813	1.9183	97.6412	8.51591	90.9536	2.46381	85.5124	0.689467	126.346	13.4273	72.7512	28.4022	1.27003	0.0683555	-1.02613	0.909849	-1.73669	0.0992742	-1.06363	0.0796111	1.05461	0.805681	1.37437	0.0270452	1.38913	0.0606638	-1.17541	0.590197	-1.64339	0.0327204	1.34213	0.341004	-1.24764	0.33044	-1.20365	0.067336
NL C16:0	neutral lipid FAMEs [ag cell]	92.5057	21.9167	90.6826	8.48866	92.1859	1.58088	118.102	13.5593	128.536	9.70643	111.693	7.5544	158.875	36.6739	94.0002	37.1835	1.28113	0.11203	-1.0201	0.920592	-1.69016	0.153818	-1.15079	0.129149	-1.00347	0.98543	1.30237	0.0846668	1.23604	0.362969	-1.18822	0.572833	-1.72342	0.123489	1.25641	0.0696966	-1.38949	0.160548	-1.23169	0.00946085
NL C18:0		65.5721	14.7328	64.9225	5.37007	65.0914	0.903538	83.7908	10.1946	88.4377	5.90425	78.8884	5.22101	107.108	23.3743	65.6537	25.8547	1.28728	0.120895	-1.01001	0.957603	-1.63142	0.168577	-1.12105	0.162853	-1.00739	0.967421	1.29063	0.102596	1.21112	0.376531	-1.20158	0.546656	-1.64551	0.125908	1.27625	0.0584995	-1.34871	0.131179	-1.21512	0.109317
NL C18:1n9c		60.1813	15.3367	59.0727	5.38846	59.6648	0.615947	76.7342	7.60348	82.5027	6.43611	71.3002	3.78483	100.644	24.3438	60.4728	24.2402	1.28609	0.0855771	-1.01877	0.930393	-1.66428	0.173539	-1.15712	0.117361	-1.00866	0.966352	1.29898	0.061662	1.21989	0.404055	-1.17905	0.593641	-1.68682	0.140171	1.2689	0.363559	-1.3709	0.288782	-1.20699	0.207815
NL C18:1n9t		25.3141	6.45299	24.9166	2.25962	25.2155	0.125703	32.0307	3.15939	34.7546	2.83019	29.8063	1.71434	42.6268	10.3818	25.1864	10.1393	1.27028	0.0925131	-1.01595	0.940639	-1.69245	0.164466	-1.16602	0.116686	-1.00391	0.984728	1.28552	0.0669988	1.22651	0.397366	-1.18343	0.587103	-1.6905	0.141076	1.27175	0.00229735	-1.37294	0.0160355	-1.19624	0.0657572
NL C18:2n6c		32.8766	8.26115	32.1935	2.89841	32.1154	0.316797	41.2582	3.92519	44.8813	3.6084	38.48	2.07744	55.0943	13.0528	32.4344	12.965	1.28468	0.0801664	-1.02122	0.920416	-1.69863	0.156501	-1.16635	0.112505	-1.0237	0.908281	1.28157	0.063523	1.22756	0.385057	-1.18639	0.578907	-1.71551	0.130405	1.27205	0.855228	-1.36514	0.49734	-1.19527	0.0623953
NL C18:3n3		26.989	6.97101	26.4067	2.2675	27.6089	0.46648	34.7008	3.4488	39.7735	3.03574	33.4891	1.52733	51.668	12.4946	30.093	12.3781	1.25687	0.098126	-1.02205	0.919214	-1.71695	0.157798	-1.18766	0.0806691	1.02297	0.911526	1.31409	0.055495	1.29905	0.309096	-1.11286	0.736292	-1.87142	0.112337	1.15312	0.187753	-1.4737	0.555673	-1.2682	0.672088
NL C18:4		27.0719	7.0293	26.1406	2.2169	27.5668	0.351234	34.368	3.24462	39.7546	2.8989	33.1869	1.48328	51.2412	12.2264	30.0776	12.3915	1.24672	0.0957647	-1.03563	0.872191	-1.70363	0.160688	-1.1979	0.0654966	1.01828	0.929823	1.31474	0.0484913	1.28894	0.314042	-1.10337	0.757416	-1.85881	0.11137	1.14265	0.33033	-1.46848	0.577096	-1.26955	0.0440024
NL C22:6n3		69.2355	17.6718	68.0905	6.22443	68.3349	0.346449	87.1492	8.42467	94.6625	7.64356	81.1976	4.55775	115.397	28.1546	68.3997	27.5439	1.27532	0.0870739	-1.01682	0.937595	-1.68711	0.16682	-1.16583	0.114594	-1.01318	0.94911	1.2799	0.0670234	1.21904	0.408873	-1.18711	0.580257	-1.6887	0.14182	1.27412	0.441079	-1.36725	0.167912	-1.1925	0.079999
TAG 1	triacylglycerides [relative abundance cell 1010]	4.17244	2.12858	42.0983	36.2397	3.44394	0.417346	1.85216	1.14005	4.16553	1.50757	4.34637	0.876123	5.24334	2.56907	4.11931	0.958059	-1.85942	0.212775	10.0896	0.276686	-1.27287	0.910014	1.04341	0.48004	-1.21153	0.241958	-22.7292	0.212775	1.25874	0.682699	-1.05512	0.326763	-1.52248	0.811952	-2.22405	0.141881	1.00166	0.0738245	9.68585	0.196255
TAG 2		3.18978	1.83973	1.03519	0.129861	2.73287	0.665745	3.04686	2.17912	3.05724	1.10483	3.24082	1.12617	5.17399	1.78414	2.69855	0.311791	1.11489	0.699295	-3.08134	0.963775	-1.91733	0.762715	1.06005	0.182209	-1.16719	0.22707	2.94327	0.699295	1.69237	0.0222068	-1.20095	0.0366234	-1.89324	0.0598721	1.12907	0.0324951	1.04335	0.012866	-3.13064	0.0977442
TAG 3		5.17612	1.32884	5.85159	1.1248	3.63551	2.57947	6.5661	1.6636	6.1884	4.16307	7.11354	3.37212	4.98856	1.32068	5.23409	1.99479	1.8061	0.629003	1.1305	0.163837	1.04922	0.695123	1.1495	0.372877	-1.42377	0.215345	1.1221	0.629003	-1.24052	0.0418276	-1.35908	0.1227	-1.37218	0.0173355	1.25449	0.129806	-1.19557	0.0294723	-1.21566	0.0683592
TAG 4		35.9175	23.2055	20.0778	4.63249	16.361	11.5863	27.6884	21.1086	31.9866	2.1519	22.0164	17.1514	29.1018	21.7958	34.7242	8.25693	1.69234	0.962933	-1.78892	0.03479	1.1932	0.518428	-1.45285	0.332696	-2.19531	0.735046	1.37906	0.962933	-1.09913	0.26815	1.5772	0.25594	-1.77873	0.428239	-1.25411	0.192249	1.12289	0.938682	-1.09656	0.0310949
TAG 5		6.56567	1.38763	5.26916	0.422963	8.19736	5.41777	7.08541	2.51985	5.76199	1.24506	4.90336	2.35365	6.01806	2.7536	4.97779	1.07108	-1.15693	0.0258034	-1.24606	0.17521	-1.20898	0.719987	-1.17511	0.0321634	1.24852	0.138836	1.34469	0.0258034	1.04444	0.0288672	1.01518	0.640981	1.36213	0.0499271	1.42341	0.0294653	1.13948	0.655758	1.0746	0.904447
TAG 6		53.4405	21.7432	45.1781	15.0532	36.208	27.6156	53.5931	2.52415	69.0001	7.89478	69.8508	25.5566	67.1506	14.4882	63.7293	7.83809	1.48015	0.362623	-1.18288	0.589873	-1.05368	0.378154	1.01233	0.00334372	-1.47593	0.910583	1.18626	0.362623	-1.02754	0.00563925	-1.09605	0.0167567	-1.85458	0.954629	-1.18913	0.0305129	-1.29116	0.087634	-1.54612	0.176542
TAG 7		0.672552	0.480582	0	0	3.43423	1.1618	0	0	4.90083	1.85333	2.42174	0.437992	5.19494	1.14433	4.68652	1.94306	-3.34107	0.659893	-1.64725	0.481469	-1.10848	0.948348	-2.02368	0.0427317	5.10627	0.634588	2.51755	0.659893	1.06001	0.396371	1.93519	0.588288	-1.51269	0.293384	-4.55939	0.0232633	-7.28691	0.0108415	-5.93145	0.0253691
TAG 8		8.72356	1.199	8.51107	2.35293	25.5782	18.1045	21.7867	12.8683	57.3728	8.92351	61.0311	29.7964	40.9385	3.79844	39.056	13.2578	-1.17403	0.523822	-1.02497	0.0349272	-1.0482	0.835373	1.06376	0.119544	2.93208	0.414627	2.5598	0.523822	-1.40144	0.647672	-1.56265	0.121397	-1.60052	0.250265	-1.79266	0.112425	-6.57676	0.939538	-7.17079	0.0166613
TAG 9		2.27414	0.550789	2.8459	0.881947	7.06945	1.64955	6.73861	5.13774	17.1056	4.40595	14.553	14.1768	32.8501	6.22382	16.271	4.99063	-1.0491	0.081081	1.25142	0.0271687	-2.01894	0.0942198	-1.17541	0.0817662	3.10863	0.0119298	2.36783	0.081081	1.92042	0.15221	1.11805	0.120104	-4.64677	0.0116124	-2.41459	0.00909419	-7.52181	0.0114326	-5.11367	0.00394577
TAG 9a		12.0529	5.05494	4.9363	0.356377	4.86594	3.44416	11.0023	0.853726	21.715	10.1817	18.607	4.1627	12.5154	9.34215	15.7049	3.4089	2.26109	0.636138	-2.4417	0.899115	1.25484	0.627908	-1.16704	0.435348	-2.47701	0.177089	2.22886	0.636138	-1.73506	0.124622	-1.18479	0.133836	-2.57205	0.244351	-1.42741	0.546387	-1.80164	0.0496879	-3.76941	0.0303766
TAG 10		6.40678	1.59211	6.76361	1.43765	26.9073	19.9407	20.0203	7.81858	59.7271	7.40819	65.8116	27.4728	21.6561	1.6343	34.7076	16.9418	-1.34401	0.197652	1.0557	0.632568	1.60267	0.209971	1.10187	0.083021	4.19983	0.174543	2.96	0.197652	-2.75798	0.0911505	-1.89617	0.0956638	1.24248	0.0599849	-1.73362	0.109129	-9.3225	0.0224326	-9.73025	0.0126961
TAG 11		0	0	0	0	2.79423	2.23606	0	0	13.2101	12.8561	5.92836	2.86124	25.61	6.94611	12.1751	3.62477	-3.70169	0.367213			-2.10348	0.390093	-2.22829	0.501946					1.93867	0.0594176	2.0537	0.184764	-9.16532	0.00798312	-16.1291	0.0512794
C8:0		2.38091	0.614869	1.35807	0.239718	3.05093	1.38498	1.86881	1.77785	5.37772	1.34942	5.29919	1.9137	4.95557	0.860375	4.48804	1.8528	-1.63255	0.59171	-1.75316	0.029703	-1.10417	0.767844	-1.01482	0.505843	1.28141	0.0702537	1.37608	0.59171	-1.08519	0.957986	-1.18074	0.605022	-1.62428	0.840889	-2.40155	0.631919	-2.25868	0.0547355	-3.902	0.0878649
C14:0		0	0	0	0	22.778	2.67507	9.7268	11.2465	41.4007	5.62842	40.3151	19.3334	24.3545	17.2451	27.969	5.45548	-2.34178	0.598122			1.14841	0.0479759	-1.02693	0.677566			3.97056	0.598122	-1.69992	0.142382	-1.44142	0.541079	-1.06921	0.000876143	-2.87546	0.0173948			-16.457	0.00774124
C18:1		14.5593	4.94299	13.5539	1.83677	36.8325	11.8919	34.0371	14.3022	59.0945	46.9181	30.2215	7.87925	38.9207	1.37657	19.5956	9.97131	-1.08213	1.33008	-1.07418	1.00457	-1.98619	1.65187	-1.95538	1.08687	2.52983	1.46145	2.51124	1.33008	-1.51833	1.04502	-1.54226	1.02073	-1.05669	1.87917	1.73697	1.07851	-4.05889	1.35447	-2.22973	1.13176
37:3 Me	alkenones [fg · cell-1]	14.3701	8.39648	6.17489	3.44504	12.5744	7.24267	9.20392	6.7451	2.42909	0.350259	2.60548	0.650497	19.2741	0.834551	9.32043	2.70387	-1.3662	0.655361	-2.32719	0.301846	-2.06794	0.0264991	1.07261	0.757413	-1.14281	0.830317	1.49054	0.611499	7.93468	0.000257119	3.57725	0.0651776	-1.5328	0.709436	-1.01266	0.0173865	5.91585	0.20664	2.36997	0.00702003
37:2 Me		5.37123	3.47068	0.995447	0.706389	9.82076	3.8165	5.12453	5.83759	3.13728	0.983388	2.06839	0.636799	10.6504	1.09562	5.39493	1.34872	-1.91642	0.228625	-5.3958	0.213044	-1.97415	0.014064	-1.51677	0.277136	1.8284	0.126286	5.14797	0.422771	3.39478	0.00204264	2.60827	0.0548106	-1.08448	0.584397	-1.05277	0.0634241	1.71207	0.124372	-2.07786	0.134177
38:3 Et		1.57783	0.80994	0.617017	0.42108	1.48572	0.761535	1.23263	0.66962	0.49709	0.1618	0.684344	0.168043	2.54565	0.387698	1.52746	0.524394	-1.20533	0.458554	-2.55719	0.233141	-1.66659	0.097649	1.3767	0.319782	-1.062	0.721193	1.99773	0.343438	5.12111	0.00893696	2.23201	0.140896	-1.71341	0.458637	-1.23919	0.042282	3.17414	0.285472	-1.10912	0.161594
38:3 Me		1.76164	1.16988	0.325719	0.223254	2.60539	0.986762	1.29637	1.60698	0.403014	0.106109	0.306256	0.0670635	3.58216	0.364596	1.79696	0.447508	-2.00976	0.279285	-5.40848	0.199448	-1.99346	0.0130361	-1.31594	0.347252	1.47896	0.328581	3.98002	0.442967	8.88842	0.00387878	5.8675	0.0396131	-1.3749	0.671641	-1.38615	0.00224333	4.37117	0.0159212	1.06355	0.0634115
38:2 Et		1.11734	0.177525	0	0	0.837064	0.584028	0.564986	0.536934	0.257336	0.0747958	0.178468	0.0484169	2.18518	0.624084	1.40108	0.494348	-1.48157	0.290774			-1.55964	0.239613	-1.44192	0.289291	-1.33484	0.831986			8.49156	0.0468107	7.85063	0.0715646	-2.61053	0.170934	-2.47986	0.321486	4.34197	0.460266
38:2 Me		0.812149	0.391319	0	0	0.484367	0.38209	0	0	0	0	0	0	1.63383	0.266264	0.863977	0.25162					-1.89105	0.0412329			-1.67672	0.629695							-3.37312	0.0623872

## Sheet: Concentrations per POC
		Concentrations per POC																Fold-changes per POC
		2N LL 400		2N LL 1000		2N HL 400		2N HL 1000		1N LL 400		1N LL 1000		1N HL 400		1N HL 1000		2N 1000/400 HL		2N 1000/400 LL		1N 1000/400 HL		1N 1000/400 LL		2N HL/LL 400 ppm		2N HL/LL 1000 ppm		1N HL/LL 400 ppm		1N HL/LL 1000 ppm		2N /1N HL 400 ppm		2N/1N HL 1000 ppm		2N/1N LL 400 ppm		2N/1N LL 1000 ppm
substance	class and unit	mean value	(±)SD	mean value	(±)SD	mean value	(±)SD	mean value	(±)SD	mean value	(±)SD	mean value	(±)SD	mean value	(±)SD	mean value	(±)SD	fold change	p-value	fold change	p-value	fold change	p-value	fold change	p-value	fold change	p-value	fold change	p-value	fold change	p-value	fold change	p-value	fold change	p-value	fold change	p-value	fold change	p-value	fold change	p-value
alanine	amino acids [(fg · fg biomass-1) · 10-6]	713.227	124.931	306.328	37.8841	561.101	195.406	455.164	18.6021	723.92	139.4	479.069	46.7104	791.793	135.757	758.928	159.26	-1.23274	0.523822	-2.32831	0.0349272	-1.04331	0.835373	-1.5111	0.119544	-1.27112	0.414627	1.48587	0.523822	1.09376	0.647672	1.58417	0.121397	-1.41114	0.250265	-1.66737	0.112425	-1.01499	0.939538	-1.56391	0.0166613
arginine		689.757	85.6168	492.457	132.592	1986.92	1027.15	2404.57	295.038	3190.12	640.919	2463.95	792.243	6242.48	1132.83	5591.02	1833.07	1.2102	0.629003	-1.40064	0.163837	-1.11652	0.695123	-1.29472	0.372877	2.8806	0.215345	4.8828	0.629003	1.95681	0.0418276	2.26913	0.1227	-3.14179	0.0173355	-2.32517	0.129806	-4.625	0.0294723	-5.00338	0.0683592
asparagine		1627.03	323.626	1146.75	203.876	988.132	495.836	980.267	101.816	2683.18	193.403	2131.83	395.008	1739.32	179.803	1837.55	437.3	-1.00802	0.984324	-1.41881	0.163648	1.05648	0.790331	-1.25862	0.177304	-1.64657	0.212903	-1.16984	0.984324	-1.54266	0.00730868	-1.16015	0.519381	-1.76021	0.154753	-1.87454	0.102335	-1.64913	0.0245173	-1.85902	0.052023
aspartate		1116.96	124.569	522.571	86.4782	898.23	389.146	744.405	76.3655	1850.52	180.573	1025.12	96.6476	1958.12	282.925	1906.23	439.74	-1.20664	0.634874	-2.13743	0.00722221	-1.02722	0.896272	-1.80518	0.0101569	-1.24351	0.516198	1.4245	0.634874	1.05814	0.677705	1.85952	0.0989957	-2.17997	0.0403677	-2.56074	0.060811	-1.65674	0.0121282	-1.96168	0.00559239
glutamate		3599.19	818.982	3664.03	1664.73	12072.9	6982.93	9833.07	1877.81	18100.7	2811.48	12013.8	4326.31	28808.3	3063.42	27371.5	5364.69	-1.22778	0.699295	1.01801	0.963775	-1.05249	0.762715	-1.50666	0.182209	3.35432	0.22707	2.68368	0.699295	1.59155	0.0222068	2.27834	0.0366234	-2.3862	0.0598721	-2.78362	0.0324951	-5.0291	0.012866	-3.27885	0.0977442
glutamine		6177.22	536.707	2952.89	580.737	8467.38	3576.27	5243.96	432.012	5003.38	1377.08	1994.85	230.758	8920.45	1342.29	8259.65	1372.3	-1.61469	0.330083	-2.09192	0.00457431	-1.08	0.651867	-2.50814	0.0868725	1.37074	0.461453	1.77587	0.330083	1.78289	0.0450194	4.14047	0.0207289	-1.05351	0.879174	-1.57508	0.0785055	1.23461	0.354472	1.48025	0.131764
glycine		113.139	32.7668	66.1794	20.8792	59.0586	7.34481	35.3163	4.14145	100.981	7.67212	68.3581	11.0933	77.5598	5.27583	74.0315	11.4318	-1.67228	0.0258034	-1.70958	0.17521	-1.04766	0.719987	-1.47724	0.0321634	-1.91571	0.138836	-1.87391	0.0258034	-1.30198	0.0288672	1.083	0.640981	-1.31327	0.0499271	-2.09624	0.0294653	1.1204	0.655758	-1.03292	0.904447
histidine		47.815	0.827649	27.0643	5.39114	89.6855	16.6281	80.1677	16.0633	91.7666	15.2317	77.0951	23.4681	92.425	4.73097	88.4951	16.1013	-1.11872	0.59171	-1.76672	0.029703	-1.04441	0.767844	-1.1903	0.505843	1.87568	0.0702537	2.96212	0.59171	1.00717	0.957986	1.14787	0.605022	-1.03055	0.840889	-1.10387	0.631919	-1.9192	0.0547355	-2.84859	0.0878649
isoleucine		38.015	1.0607	23.8595	6.01135	101.441	14.6389	82.6184	21.2398	129.23	20.6562	115.367	16.5641	178.929	16.5294	155.397	29.1271	-1.22782	0.367213	-1.59329	0.0753576	-1.15143	0.390093	-1.12016	0.501946	2.66844	0.0251071	3.46271	0.367213	1.38458	0.0594176	1.34697	0.184764	-1.76388	0.00798312	-1.8809	0.0512794	-3.39946	0.0244424	-4.83528	0.00921294
leucine		3.09265	0.271856	2.54284	0.583216	8.04603	2.83324	8.65153	2.92519	386.323	120.345	361.682	41.5928	428.131	17.7688	365.048	57.3564	1.07525	0.843741	-1.21622	0.318116	-1.17281	0.256257	-1.06813	0.805562	2.60166	0.130695	3.40231	0.843741	1.10822	0.673205	1.00931	0.949952	-53.2102	0.000687147	-42.1946	0.012534	-124.917	0.0459349	-142.236	0.00663113
lysine		963.577	335.814	1354.13	279.063	2071.37	967.438	3341.16	691.542	2070.67	515.81	1747.12	219.095	2262.14	319.096	2210.74	504.815	1.61302	0.212775	1.40531	0.276686	-1.02325	0.910014	-1.18519	0.48004	2.14966	0.241958	2.46739	0.212775	1.09247	0.682699	1.26537	0.326763	-1.0921	0.811952	1.51133	0.141881	-2.14894	0.0738245	-1.29022	0.196255
methionine		3.17995	0.97706	2.7136	0.81607	31.6379	19.4829	74.9131	32.5585	97.2148	20.3588	55.0329	8.61454	352.651	120.135	199.248	68.9765	2.36783	0.197652	-1.17186	0.632568	-1.76991	0.209971	-1.76649	0.083021	9.9492	0.174543	27.6065	0.197652	3.62754	0.0911505	3.62052	0.0956638	-11.1465	0.0599849	-2.65972	0.109129	-30.5712	0.0224326	-20.2804	0.0126961
phenylalanine		8.02774	1.2615	4.64423	1.4796	8.31356	4.24669	10.9491	0.356402	116.292	38.8107	101.42	8.68319	165.394	6.08043	116.065	24.7781	1.31702	0.472914	-1.72854	0.0711959	-1.425	0.0988703	-1.14663	0.64548	1.0356	0.934498	2.35757	0.472914	1.42223	0.213242	1.1444	0.498512	-19.8944	2.00598e-05	-10.6004	0.0266548	-14.4862	0.0585131	-21.8379	0.00323436
proline		36.7418	3.87043	21.208	4.9351	64.4473	6.58934	45.8785	8.83768	234.67	31.4195	170.254	17.1428	297.341	38.5478	220.857	29.4075	-1.40474	0.081081	-1.73245	0.0271687	-1.34631	0.0942198	-1.37835	0.0817662	1.75406	0.0119298	2.16327	0.081081	1.26706	0.15221	1.29722	0.120104	-4.6137	0.0116124	-4.81394	0.00909419	-6.38701	0.0114326	-8.02781	0.00394577
serine		299.126	44.9966	165.158	39.4381	338.044	137.853	332.571	66.1106	293.416	85.6137	380.49	71.1887	473.262	166.686	605.795	204.719	-1.01646	0.962933	-1.81115	0.03479	1.28004	0.518428	1.29676	0.332696	1.13011	0.735046	2.01365	0.962933	1.61294	0.26815	1.59214	0.25594	-1.4	0.428239	-1.82155	0.192249	1.01946	0.938682	-2.3038	0.0310949
threonine		422.695	68.7032	355.97	140.388	405.922	179.103	555.154	65.5707	278.746	19.8446	153.98	20.0826	397.75	23.1672	357.785	49.1146	1.36764	0.362623	-1.18745	0.589873	-1.1117	0.378154	-1.81028	0.00334372	-1.04132	0.910583	1.55955	0.362623	1.42692	0.00563925	2.32359	0.0167567	1.02055	0.954629	1.55164	0.0305129	1.51642	0.087634	2.3118	0.176542
tryptophan		0.276043	0.0572028	0.199977	0.0270178	0.619929	0.161112	0.790121	0.371731	23.2267	7.15172	20.7136	2.56829	34.8795	1.51979	23.1226	4.29415	1.27453	0.598122	-1.38037	0.192389	-1.50846	0.0479759	-1.12133	0.677566	2.24578	0.0810813	3.95106	0.598122	1.5017	0.142382	1.1163	0.541079	-56.2636	0.000876143	-29.2646	0.0173948	-84.1419	0.045271	-103.58	0.00774124
tyrosine		0.964348	0.126702	0.66285	0.192923	1.5554	0.330495	1.87921	0.215898	40.1737	22.2137	47.6255	9.04197	33.5664	6.18485	31.1406	11.8269	1.20818	0.320099	-1.45485	0.14962	-1.0779	0.813679	1.18549	0.693748	1.61291	0.113541	2.83504	0.320099	-1.19684	0.719832	-1.52937	0.197233	-21.5805	0.0179273	-16.5711	0.0728179	-41.6589	0.129926	-71.8496	0.0179981
valine		133.15	39.1335	126.842	52.8022	337.424	144.567	397.212	69.6721	345.494	82.6184	286.725	40.9482	505.135	82.1018	455.991	103.45	1.17719	0.636138	-1.04973	0.899115	-1.10777	0.627908	-1.20497	0.435348	2.53417	0.177089	3.13155	0.636138	1.46206	0.124622	1.59034	0.133836	-1.49703	0.244351	-1.14798	0.546387	-2.59478	0.0496879	-2.26049	0.0303766
DMSP	osmolytes [fg cell-1] 10^-3	33.2362	3.60023	25.5252	1.25501	20.4279	12.4195	17.4587	2.91489	0.00185782	0.00262736	0	0	0.0496002	0.0339019	0.038809	0.0133793	-1.17007	0.770529	-1.30209	0.0808455	-1.27806	0.707461			-1.627	0.279433	-1.46204	0.0433015	26.698	0.183961			411.852	0.146085	449.862	0.0137112	17889.8
glycine betaine		2.90225	0.324933	1.67964	0.488377	2.9866	1.17569	1.92507	0.235311	2.30262	0.556108	2.35609	0.275648	1.86979	0.27761	2.30471	0.252136	-1.55143	0.329064	-1.7279	0.0500078	1.23261	0.176981	1.02322	0.910904	1.02906	0.929952	1.14612	0.569273	-1.23148	0.398701	-1.02229	0.855326	1.59729	0.309918	-1.19721	0.194853	1.26041	0.273761	-1.40274	0.182015
homarine		4.35503	0.45626	2.6505	0.281221	3.6977	1.76343	2.95444	0.245858	3.36696	0.698069	3.19826	0.436364	3.21033	0.503475	2.95498	0.420811	-1.25157	0.612803	-1.6431	0.016395	-1.08641	0.612253	-1.05275	0.788971	-1.17777	0.655217	1.11467	0.315016	-1.04879	0.810792	-1.08233	0.600723	1.15181	0.738628	-1.00018	0.99884	1.29346	0.180513	-1.20666	0.221604
mannitol	sugar [fg cell-1] · 10^-9	8.13929	3.07356	6.50476	1.80885	16.5287	1.00587	12.4491	2.42402	1.65367	1.29192	0.284541	0.0300462	5.48105	1.55977	4.08209	1.87945	-1.32771	0.134851	-1.25128	0.559935	-1.34271	0.464795	-5.81171	0.272647	2.03073	0.0464091	1.91384	0.0544172	3.31448	0.0576882	14.3463	0.103718	3.01561	0.00631641	3.04968	0.0203432	4.92196	0.0799842	22.8606	0.0397439
a-ketoglutarate	small carboxylic acids [ag cell-1] 10^-7	10.627	1.71577	5.19866	0.934213	12.0496	3.7858	4.9429	0.641066	13.3318	1.86912	12.9749	1.5589	13.2291	1.25478	9.89578	1.28695	-1.37088	0.0799321	-1.29072	0.445768	-1.89822	0.162477	-1.3572	0.063668	2.88333	0.0667165	2.71473	0.0951009	1.84642	0.152841	1.32017	0.564281	3.19106	0.228592	4.41855	0.0634241	2.04348	0.124372	2.14874	0.134177
citrate		2.92407	0.83172	2.26546	0.720015	8.43107	4.80717	6.15011	1.9757	1.43092	0.100811	1.05432	0.165575	2.64209	0.766547	1.39188	0.690362	-2.01616	0.0808331	-1.51447	0.372123	-1.00748	0.961337	-1.35549	0.301481	1.28784	0.290026	-1.03372	0.808678	2.44783	0.0318871	3.29338	0.0024383	-16.4988	0.0186853	-33.0171	0.00224333	-8.68024	0.0159212	-9.69828	0.0634115
fumarate		55.773	42.6624	5.98493	1.39348	11.086	3.64391	7.21203	1.79499	12.2015	0.465001	13.2725	4.88495	15.4942	1.62873	12.3922	0.651966	-1.8905	0.169656	-3.82691	0.112221	-1.49991	0.124299	1.12852	0.388644	-1.38444	0.663854	1.46217	0.46519	1.06678	0.600657	-1.58671	0.0914285	-1.08331	0.734026	-1.36541	0.321486	1.36331	0.460266	-3.16783	0.0312648
lactate		5.7734	2.42729	3.81216	0.629335	7.43523	1.22266	3.68781	0.143426	50.1145	9.21869	36.9714	12.4452	122.672	22.7433	121.761	7.93333	-3.14031	0.0321256	-6.1553	0.327172	-2.22331	0.200769	-1.73199	0.0713746	-2.61681	0.4902	-1.33504	0.591954	1.16585	0.689363	-1.10106	0.619442	-1.6804	0.306851	-2.37347	0.103901	1.81553	0.562282	-1.95749	0.0145471
malate		3.49765	1.45138	0.913962	0.665112	2.52641	0.710259	1.33637	0.125561	2.56555	0.206524	2.89527	0.41339	2.73688	0.363249	1.8247	0.53017	-2.43775	0.0768364	-2.04418	0.0277962	-1.33684	0.0586731	-1.02751	0.846162	1.13387	0.163247	-1.05174	0.76748	-1.00776	0.952078	-1.31116	0.099987	-1.09789	0.709844	-2.00202	0.0173865	-1.25452	0.20664	-2.49582	0.00702003
pyruvate		2.36074	1.18667	1.09107	0.10087	1.7541	0.666119	1.27828	0.177398	1.70748	0.307368	1.20049	0.242124	2.07985	0.508716	1.29231	0.381528	-1.37223	0.196831	-2.16369	0.268943	-1.60941	0.160338	-1.42231	0.144748	-1.34584	0.858206	1.17159	0.280821	1.21809	0.435611	1.07648	0.79055	-1.18571	0.613722	-1.01097	0.965543	1.38259	0.521517	-1.10029	0.601319
succinate		28.0984	25.8804	4.56491	1.12056	10.7376	2.86413	3.4193	2.44373	15.4767	2.76576	8.93578	0.681087	18.0435	7.60287	8.1156	1.93976	-1.53716	0.16002	-9.31891	0.240554	-1.25032	0.0997189	1.08778	0.786301	-5.03092	0.294449	1.20503	0.490058	1.26986	0.0940116	-1.07104	0.82344	-1.39763	0.22365	-1.71827	0.042282	4.57098	0.285472	-2.21766	0.161594
chlorophyll a	pigments [relative abundance cell 10^3] 10^-6	12.6297	0.976922	7.40982	0.262015	9.28621	3.62816	8.85476	0.912274	12.6076	0.967922	9.26162	1.42195	12.0295	0.295259	10.6447	2.04617	-1.04873	0.883923	-1.70446	0.0125054	-1.13008	0.440056	-1.36128	0.0590287	-1.36005	0.321358	1.195	0.146014	-1.04806	0.492217	1.14934	0.481295	-1.29541	0.396913	-1.20215	0.346921	1.00175	0.982966	-1.24991	0.20372
chlorophyll c2		5.70803	0.687318	2.71736	0.290509	4.67757	2.15047	3.52021	0.229321	6.5832	1.9235	4.47271	1.4505	10.8295	0.930973	5.8743	0.286671	-1.32878	0.526634	-2.10058	0.0144779	-1.84353	0.0115342	-1.47186	0.287824	-1.2203	0.574819	1.29545	0.0400681	1.64501	0.0702962	1.31336	0.303822	-2.31519	0.039954	-1.66874	0.00101753	-1.15332	0.59503	-1.64598	0.226037
chlorophyll c3		4.81459	0.333322	3.18215	0.490077	3.49684	0.843871	2.8439	0.291944	4.47888	0.147466	2.07071	1.1891	4.20623	0.921685	2.52349	0.327348	-1.22959	0.391492	-1.513	0.0223494	-1.66683	0.110302	-2.16297	0.101176	-1.37684	0.145787	-1.11894	0.458739	-1.06482	0.717877	1.21866	0.649304	-1.20287	0.467402	1.12697	0.360647	1.07495	0.290953	1.53674	0.318816
diadinoxanthin		2.34647	0.372516	1.41982	0.212266	2.68307	1.3197	2.35511	0.322656	3.19498	0.320953	2.17373	0.514571	3.49911	0.209026	2.95851	0.152305	-1.13926	0.762234	-1.65265	0.051204	-1.18273	0.0466593	-1.46981	0.088405	1.14345	0.757537	1.65873	0.0334908	1.09519	0.333707	1.36103	0.155334	-1.30414	0.475011	-1.25621	0.101169	-1.36161	0.0725657	-1.53099	0.162898
fucoxanthin		0.881212	0.120285	0.404926	0.101977	1.29702	0.455713	1.01649	0.101266	2.18409	0.528133	1.37126	0.969958	2.94689	0.892654	1.38806	0.67065	-1.27599	0.477895	-2.17623	0.013691	-2.12303	0.125024	-1.59276	0.37244	1.47186	0.325111	2.5103	0.00384076	1.34925	0.369453	1.01225	0.985003	-2.27204	0.103032	-1.36555	0.516457	-2.47851	0.0666814	-3.38644	0.293672
h4k-fucoxanthin		0.68426	0.13848	0.279422	0.139235	1.09222	0.15254	0.469151	0.0865904	1.91343	0.63609	0.813358	0.48098	1.42022	0.336858	0.692451	0.517876	-2.32808	0.0133201	-2.44884	0.0434406	-2.05101	0.182649	-2.3525	0.128089	1.5962	0.0493088	1.67901	0.190818	-1.34727	0.403148	-1.17461	0.820796	-1.30031	0.304587	-1.47597	0.605789	-2.79634	0.105782	-2.91086	0.253174
hex-fucoxanthin		21.1064	1.23283	12.2378	0.584089	15.3127	5.73529	14.1741	1.46396	20.8821	1.587	11.0375	7.81033	20.4733	0.662475	16.8272	3.58315	-1.08033	0.808461	-1.72469	0.00331245	-1.21668	0.285211	-1.89192	0.213135	-1.37836	0.287479	1.15822	0.19381	-1.01997	0.761335	1.52454	0.415335	-1.33701	0.330752	-1.18718	0.412315	1.01074	0.882634	1.10875	0.848316
PL C14:0	polar lipid FAMEs [fg cell] 10^-3	8.9009	1.79182	6.05696	0.413093	8.92234	2.71642	8.1546	0.626335	9.14039	0.145927	6.80162	0.242911	10.6386	0.846623	7.36597	3.83706	-1.09415	0.73126	-1.46953	0.147948	-1.44429	0.350777	-1.34385	0.00088157	1.00241	0.993077	1.34632	0.0220954	1.16391	0.125507	1.08297	0.854637	-1.19236	0.470676	1.10706	0.799988	-1.02691	0.867748	-1.12294	0.108908
PL C16:0		21.4171	6.82857	16.3592	1.93365	18.5457	8.16164	18.2371	2.74143	18.9396	0.920373	14.6891	1.1982	22.6133	1.90893	19.9596	14.637	-1.01692	0.963413	-1.30918	0.406895	-1.13296	0.822361	-1.28936	0.0186117	-1.15483	0.722741	1.11479	0.477513	1.19397	0.0950362	1.3588	0.661629	-1.21933	0.557247	-1.09445	0.884216	1.13081	0.660082	1.11369	0.36842
PL C18:0		21.962	7.31028	17.1993	2.03556	18.1032	9.07204	18.6147	2.38209	17.5213	1.22888	14.2522	2.22	21.7541	2.03377	19.8851	14.9616	1.02826	0.944784	-1.27692	0.457415	-1.09399	0.876645	-1.22938	0.162426	-1.21316	0.664925	1.08229	0.558477	1.24158	0.0788847	1.39523	0.649044	-1.20167	0.629962	-1.06825	0.915974	1.25345	0.481949	1.20678	0.239136
PL C18:1n9c		8.29971	2.12803	5.34597	0.51665	7.00077	0.890866	6.45213	0.645297	9.76579	0.281157	6.98254	0.107095	11.1633	1.18084	6.22619	2.52043	-1.08503	0.523038	-1.55252	0.183146	-1.79296	0.0918648	-1.3986	0.00202878	-1.18554	0.490333	1.20692	0.134789	1.1431	0.232364	-1.12148	0.71268	-1.59458	0.0188962	1.03629	0.912315	-1.17664	0.433039	-1.30613	0.0414753
PL C18:1n9t		3.3977	0.94188	2.15563	0.190649	2.96077	0.239414	2.77012	0.50255	4.15927	0.106048	3.00419	0.077848	4.71939	0.504309	2.67801	1.11179	-1.06882	0.662762	-1.5762	0.199432	-1.76228	0.105517	-1.38449	0.00039422	-1.14757	0.583351	1.28506	0.219448	1.13467	0.254216	-1.1218	0.718767	-1.59397	0.0232994	1.0344	0.922192	-1.22414	0.371166	-1.39365	0.0140909
PL C18:2n6c		4.48236	1.14102	2.83675	0.253155	3.48246	0.312814	3.10284	0.279791	5.35443	0.141846	3.81093	0.0193055	6.03956	0.700141	3.17711	1.22848	-1.12235	0.27078	-1.5801	0.173185	-1.90096	0.0602233	-1.40502	0.00366695	-1.28712	0.340692	1.0938	0.375572	1.12796	0.299152	-1.1995	0.5415	-1.73428	0.0215804	-1.02393	0.94052	-1.19456	0.392817	-1.34341	0.0315162
PL C18:3n3		3.90456	1.09297	2.41453	0.191325	2.94834	0.288851	2.56038	0.199558	4.62125	0.27511	3.4804	0.17472	4.96145	0.501717	2.55886	1.06358	-1.15153	0.20187	-1.61711	0.190572	-1.93893	0.0671083	-1.3278	0.0117992	-1.32432	0.341235	1.06041	0.497139	1.07362	0.460308	-1.36014	0.344739	-1.68279	0.0138781	1.00059	0.998584	-1.18355	0.454105	-1.44144	0.00445727
PL C18:4		3.9367	0.996007	2.39578	0.146111	3.22756	0.294053	2.86452	0.292492	4.85185	0.124592	3.39478	0.0364186	5.66772	0.579392	2.96259	1.10962	-1.12674	0.283449	-1.64318	0.157549	-1.9131	0.0547989	-1.42921	0.00195647	-1.21971	0.422918	1.19565	0.137545	1.16815	0.180056	-1.14588	0.637125	-1.75604	0.0134131	-1.03424	0.913642	-1.23247	0.322924	-1.41698	0.00757923
PL C22:6n3		9.78529	2.69116	5.98519	0.479278	7.11205	0.177456	6.47488	0.564715	11.8122	0.319975	8.51717	0.068672	13.0929	1.39143	6.87629	2.68452	-1.09841	0.247274	-1.63492	0.18056	-1.90406	0.0620628	-1.38686	0.00340078	-1.37587	0.295036	1.08182	0.404026	1.10842	0.321764	-1.23863	0.478493	-1.84094	0.0244715	-1.062	0.853825	-1.20713	0.398473	-1.42304	0.0159113
NL C16:0	neutral lipid FAMEs [fg cell] 10^-3	12.4169	2.94184	7.63965	0.715136	8.52783	0.146242	7.83173	0.899157	16.6929	1.26058	11.1248	0.75243	16.4637	3.8004	8.88471	3.51451	-1.08888	0.387966	-1.62532	0.141841	-1.85304	0.107578	-1.50051	0.0101768	-1.45604	0.202208	1.02514	0.825261	-1.01392	0.941661	-1.25213	0.464268	-1.93059	0.0978676	-1.13445	0.717131	-1.34437	0.164985	-1.45619	0.00904083
NL C18:0		8.80163	1.97756	5.46946	0.452407	6.02141	0.0835835	5.55642	0.676034	11.4854	0.766786	7.85741	0.520021	11.0993	2.42221	6.20545	2.44374	-1.08368	0.433614	-1.60923	0.133839	-1.78864	0.114614	-1.46173	0.00751427	-1.46172	0.184906	1.0159	0.888153	-1.03479	0.846771	-1.26621	0.441356	-1.84331	0.0972511	-1.11681	0.747902	-1.30492	0.185907	-1.4366	0.00844539
NL C18:1n9c		8.07803	2.05861	4.97664	0.453956	5.5194	0.0569794	5.08848	0.50421	10.7146	0.835858	7.10162	0.376975	10.4294	2.52267	5.71577	2.29113	-1.08469	0.35007	-1.62319	0.161577	-1.82467	0.122749	-1.50876	0.0139078	-1.46357	0.220799	1.02247	0.827227	-1.02735	0.891037	-1.24246	0.48353	-1.88959	0.110455	-1.12328	0.738818	-1.32639	0.204081	-1.42699	0.00766501
NL C18:1n9t		3.39786	0.866174	2.09912	0.190364	2.33261	0.0116284	2.12405	0.209509	4.51359	0.367557	2.96875	0.170751	4.41729	1.07584	2.38057	0.958347	-1.09819	0.294345	-1.61871	0.162851	-1.85556	0.117162	-1.52036	0.0145785	-1.45668	0.224103	1.01188	0.906944	-1.0218	0.913739	-1.24708	0.478174	-1.89371	0.11134	-1.12077	0.744254	-1.32836	0.202249	-1.41428	0.00884335
NL C18:2n6c		4.41297	1.10888	2.71217	0.244179	2.9709	0.0293059	2.73595	0.260291	5.82874	0.468623	3.83267	0.206917	5.70925	1.35262	3.06564	1.22543	-1.08587	0.329598	-1.6271	0.156961	-1.86234	0.110571	-1.5208	0.0147188	-1.4854	0.207195	1.00877	0.929466	-1.02093	0.914944	-1.2502	0.470478	-1.92173	0.103346	-1.1205	0.742863	-1.32082	0.20514	-1.41314	0.00830484
NL C18:3n3		3.62268	0.935706	2.22466	0.191028	2.55402	0.0431527	2.30112	0.228701	5.16539	0.394252	3.33557	0.152124	5.35419	1.29478	2.84432	1.16996	-1.1099	0.256106	-1.62842	0.164391	-1.88241	0.112417	-1.54858	0.013337	-1.41843	0.247469	1.03437	0.735636	1.03655	0.859285	-1.17271	0.613895	-2.09638	0.0921717	-1.23606	0.581214	-1.42585	0.131246	-1.49936	0.00354547
NL C18:4		3.63381	0.94353	2.20224	0.186765	2.55012	0.0324916	2.27905	0.21516	5.16294	0.37648	3.30546	0.147737	5.30997	1.26698	2.84287	1.17122	-1.11894	0.214676	-1.65005	0.16063	-1.86782	0.113652	-1.56194	0.0112985	-1.42496	0.245706	1.03488	0.722768	1.02848	0.887494	-1.16272	0.633636	-2.08225	0.0910937	-1.24739	0.568232	-1.42081	0.136127	-1.50096	0.00335499
NL C22:6n3		9.29336	2.37206	5.73635	0.524383	6.32146	0.0320489	5.77913	0.558665	12.2938	0.99267	8.08741	0.453959	11.9583	2.91757	6.465	2.60339	-1.09384	0.303306	-1.62008	0.162774	-1.8497	0.118795	-1.52012	0.0144674	-1.47013	0.218412	1.00746	0.940882	-1.02806	0.889377	-1.25095	0.472248	-1.8917	0.111891	-1.11868	0.747929	-1.32286	0.208191	-1.40985	0.00913629
TAG 1	triacylglycerides [relative abundance cell 1010] 10^-15	56.0059	28.5716	354.661	305.305	31.8589	3.86074	12.2823	7.55999	54.0978	19.5788	43.2905	8.72632	54.3351	26.6225	38.9348	9.05538	-2.59389	0.047607	6.33256	0.506574	-1.39554	0.506247	-1.24965	0.531284	-1.75794	0.354258	-28.8759	0.463559	1.00439	0.992425	-1.11187	0.649942	-1.70549	0.354637	-3.17001	0.0345484	1.03527	0.942102	8.19258	0.493694
TAG 2		42.8159	24.6944	8.7211	1.09402	25.281	6.15861	30.307	2.65517	39.7045	14.3484	32.2791	11.2168	53.6165	18.4885	25.5061	2.94699	1.19881	0.398227	-4.90946	0.189671	-2.1021	0.161512	-1.23004	0.596806	-1.6936	0.42278	3.47513	0.0474422	1.35039	0.450557	-1.26554	0.486471	-2.12082	0.152647	1.18822	0.280419	1.07836	0.886733	-3.70127	0.094487
TAG 3		69.4782	17.8367	49.2973	9.47599	50.4464	2.40862	43.5418	11.0318	80.3688	54.0658	70.852	33.5868	51.6949	13.6858	49.4716	18.8543	-1.15857	0.474856	-1.40937	0.291057	-1.04494	0.899753	-1.13432	0.844778	-1.37727	0.268531	-1.13218	0.680045	-1.55467	0.535198	-1.43218	0.48728	-1.02475	0.910725	-1.13619	0.724979	-1.15675	0.808048	-1.43724	0.470735
TAG 4		482.114	311.483	169.147	39.0269	227.026	7.17691	183.61	139.977	415.41	27.9468	219.287	170.83	452.36	91.1683	328.206	78.0428	-1.23646	0.704077	-2.85026	0.289947	-1.37828	0.378453	-1.89437	0.244012	-2.12361	0.366394	1.0855	0.901885	1.08895	0.755323	1.4967	0.476114	-1.99255	0.242978	-1.78752	0.288325	1.16057	0.791001	-1.29643	0.725419
TAG 5		88.1297	18.6258	44.3906	3.5633	75.8313	50.1181	46.9855	16.7099	74.831	16.1696	48.8383	23.4427	62.3633	28.5347	47.049	10.1236	-1.61393	0.507831	-1.98533	0.0715822	-1.3255	0.535453	-1.53222	0.274384	-1.16218	0.769844	1.05846	0.850373	-1.19992	0.626373	-1.03803	0.927906	1.21596	0.761818	-1.00135	0.996594	1.17772	0.489034	-1.1002	0.815809
TAG 6		717.322	291.855	380.608	126.817	502.424	117.256	355.392	16.7384	896.105	102.53	695.726	254.548	695.861	150.137	602.357	74.084	-1.41372	0.427003	-1.88468	0.260025	-1.15523	0.488746	-1.28802	0.38717	-1.42772	0.434173	-1.07095	0.875147	-1.28776	0.203539	-1.15501	0.66143	-1.38501	0.324823	-1.69491	0.0366547	-1.24924	0.484666	-1.82793	0.247771
TAG 7		13.5413	1.13852	0	0	31.769	10.7475	0	0	63.6471	24.0692	24.1209	4.36247	53.8335	11.8583	44.2961	18.3654					-1.21531	0.575907	-2.63867	0.14184	2.34608	0.135726			-1.18229	0.641646	1.83642	0.257519	-1.69453	0.123673			-4.70021	0.0979551
TAG 8		117.095	16.094	71.7024	19.8225	354.924	9.13812	144.474	85.3333	745.101	115.89	607.879	296.777	424.233	39.3621	369.15	125.31	-2.45666	0.070213	-1.63307	0.209387	-1.14922	0.604449	-1.22574	0.591567	3.03108	0.000548442	2.01491	0.353255	-1.75635	0.0475308	-1.6467	0.379505	-1.19528	0.120524	-2.55513	0.113428	-6.36323	0.0151973	-8.47781	0.123844
TAG 9		30.5254	7.39314	23.9755	7.43005	65.3973	15.2594	44.6857	34.0699	222.151	57.2201	217.425	118.952	340.415	64.4956	153.79	47.1705	-1.46349	0.494214	-1.27319	0.546108	-2.21351	0.0340109	-1.02174	0.975131	2.14239	0.0649543	1.86381	0.486188	1.53236	0.12541	-1.41378	0.687377	-5.20534	0.0216277	-3.44159	0.0627343	-7.2776	0.0398416	-9.06861	0.350123
TAG 9a		161.785	67.8515	41.5863	3.00233	67.5199	1.73842	72.9596	5.66131	282.013	132.23	185.328	41.4611	194.541	37.985	148.439	32.2202	1.08056	0.311848	-3.89033	0.128619	-1.31058	0.421066	-1.5217	0.412927	-2.3961	0.188236	1.75441	0.00826849	-1.44964	0.459288	-1.24851	0.379862	-2.88123	0.09476	-2.03454	0.0761186	-1.74314	0.335998	-4.45647	0.0379576
TAG 10		85.997	21.3707	56.9807	12.1116	373.367	67.6283	132.76	51.8473	775.677	96.2103	655.494	273.634	224.415	16.9357	328.049	160.131	-2.81234	0.116515	-1.50923	0.232312	1.46179	0.456993	-1.18335	0.60675	4.34163	0.132923	2.32992	0.166865	-3.45643	0.012852	-1.99816	0.234108	1.66373	0.263147	-2.47099	0.220818	-9.01982	0.00730242	-11.5038	0.0899701
TAG 11		0	0	0	0	38.7729	11.8616	0	0	257.34	140.499	59.0474	28.4984	265.389	71.9804	115.076	34.2606					-2.3062	0.0798174	-4.35819	0.388767					1.03128	0.964256	1.94888	0.152397	-6.8447	0.0410856
C8:0		31.9585	8.25328	11.4412	2.01953	28.2233	12.812	12.3926	11.7894	69.8406	17.525	52.7808	19.0607	51.3531	8.91581	42.42	17.5123	-2.27742	0.268326	-2.79328	0.0606882	-1.21059	0.566466	-1.32322	0.404546	-1.13235	0.749155	1.08316	0.920882	-1.36001	0.27651	-1.24424	0.601795	-1.81953	0.112522	-3.423	0.124517	-2.18535	0.0741034	-4.61322	0.0888087
C14:0		0	0	0	0	210.712	24.7463	96.7519	74.5791	537.672	73.0964	401.545	192.564	378.567	11.5117	264.357	51.5641	-2.17786	0.348766			-1.43203	0.0781734	-1.33901	0.429345					-1.42028	0.085131	-1.51895	0.421902	-1.79661	0.00412124	-2.73232	0.212486	-1.5	0.00911501
C18:1		195.426	66.3489	114.186	15.4741	340.726	110.009	225.71	94.8424	767.461	609.325	301.011	78.4786	403.323	14.2649	185.214	94.2468	-1.50958	0.326729	-1.71147	0.220663	-2.17761	0.0788677	-2.54961	0.392208	1.7435	0.200136	1.97668	0.234973	-1.90284	0.487034	-1.62521	0.25486	-1.18372	0.506187	1.21865	0.69047	-3.92711	0.315117	-2.63614	0.0693082
37:3 Me	alkenones [fg cell-1]10^-3	1.92888	1.12704	0.52021	0.290231	1.16322	0.669997	0.61034	0.447288	0.315466	0.0454882	0.25951	0.0647906	1.99731	0.0864819	0.880948	0.255564	-1.90586	0.394149	-3.70788	0.214289	-2.26723	0.0170397	-1.21563	0.380076	-1.65822	0.46506	1.17326	0.82465	6.3313	0.000142588	3.39466	0.0672411	-1.71705	0.518558	-1.44337	0.0173865	6.11437	0.20664	2.00459	0.00702003
37:2 Me		0.72097	0.465863	0.0838624	0.0595105	0.908488	0.353053	0.339823	0.387108	0.407439	0.127713	0.206015	0.0634262	1.10367	0.113536	0.509917	0.127479	-2.67342	0.0991656	-8.59706	0.191032	-2.1644	0.008209	-1.97771	0.141827	1.26009	0.362915	4.05215	0.44913	2.70879	0.00469293	2.47514	0.0584974	-1.21484	0.910473	-1.50054	0.0634241	1.76952	0.124372	-2.45659	0.134177
38:3 Et		0.21179	0.108717	0.0519812	0.0354743	0.13744	0.0704473	0.0817396	0.0444045	0.0645572	0.021013	0.0681617	0.0167374	0.263798	0.040176	0.144373	0.0495647	-1.68144	0.293191	-4.07435	0.164132	-1.8272	0.059686	1.05584	0.859179	-1.54096	0.730052	1.57248	0.501998	4.08627	0.00825043	2.11809	0.151626	-1.91937	0.320214	-1.76625	0.042282	3.28065	0.285472	-1.31128	0.161594
38:3 Me		0.236462	0.157031	0.0274405	0.0188083	0.241017	0.0912823	0.085966	0.106564	0.0523395	0.0137804	0.0305036	0.00667963	0.371208	0.037782	0.169845	0.0422976	-2.80363	0.160244	-8.61727	0.186794	-2.18557	0.00762687	-1.71585	0.140569	1.01926	0.71853	3.13282	0.465027	7.09231	0.00322923	5.56803	0.040208	-1.54018	0.457131	-1.97572	0.00224333	4.51785	0.0159212	-1.11163	0.0634115
38:2 Et		0.149979	0.0238288	0	0	0.0774342	0.0540267	0.0374659	0.0356057	0.0334202	0.00971374	0.0177757	0.0048224	0.226444	0.064672	0.132428	0.0467247	-2.06679	0.178797			-1.70994	0.177942	-1.88011	0.13623	-1.93686	0.397763			6.77565	0.0489809	7.44993	0.0724493	-2.92434	0.126411	-3.53461	0.321486	4.48768	0.460266
38:2 Me		0.109013	0.052526	0	0	0.0448073	0.035346	0	0	0	0	0	0	0.169309	0.0275922	0.0816613	0.0237826					-2.0733	0.0281365			-2.43294	0.904793							-3.77859	0.0401955
